# Supplementary material
Source: Springer Nature journal article supplement (https://www.springermedizin.de/resource/supplementary/13601_2013_653_MOESM5_ESM.pdf/9678616)

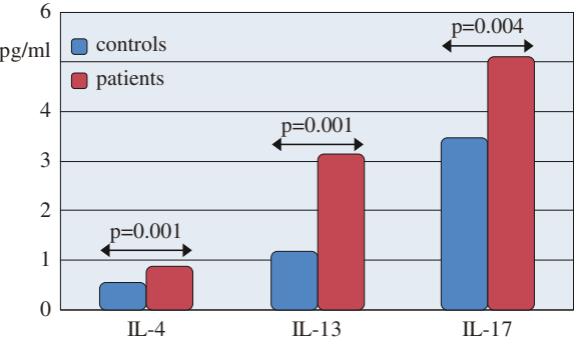

Supplement: MOESM5 [file 9678616]
